# Supplementary material for: Pyrenoid loss in Chlamydomonas reinhardtii causes limitations in CO2 supply, but not thylakoid operating efficiency
Source: PubMed Central journal article supplement (PMC5853600; doi:10.1093/jxb/erx197), 2017-06-20
Supplement: erx197_suppl_supplementary_figure_s1.pdf [file erx197_suppl_supplementary_figure_s1.pdf]

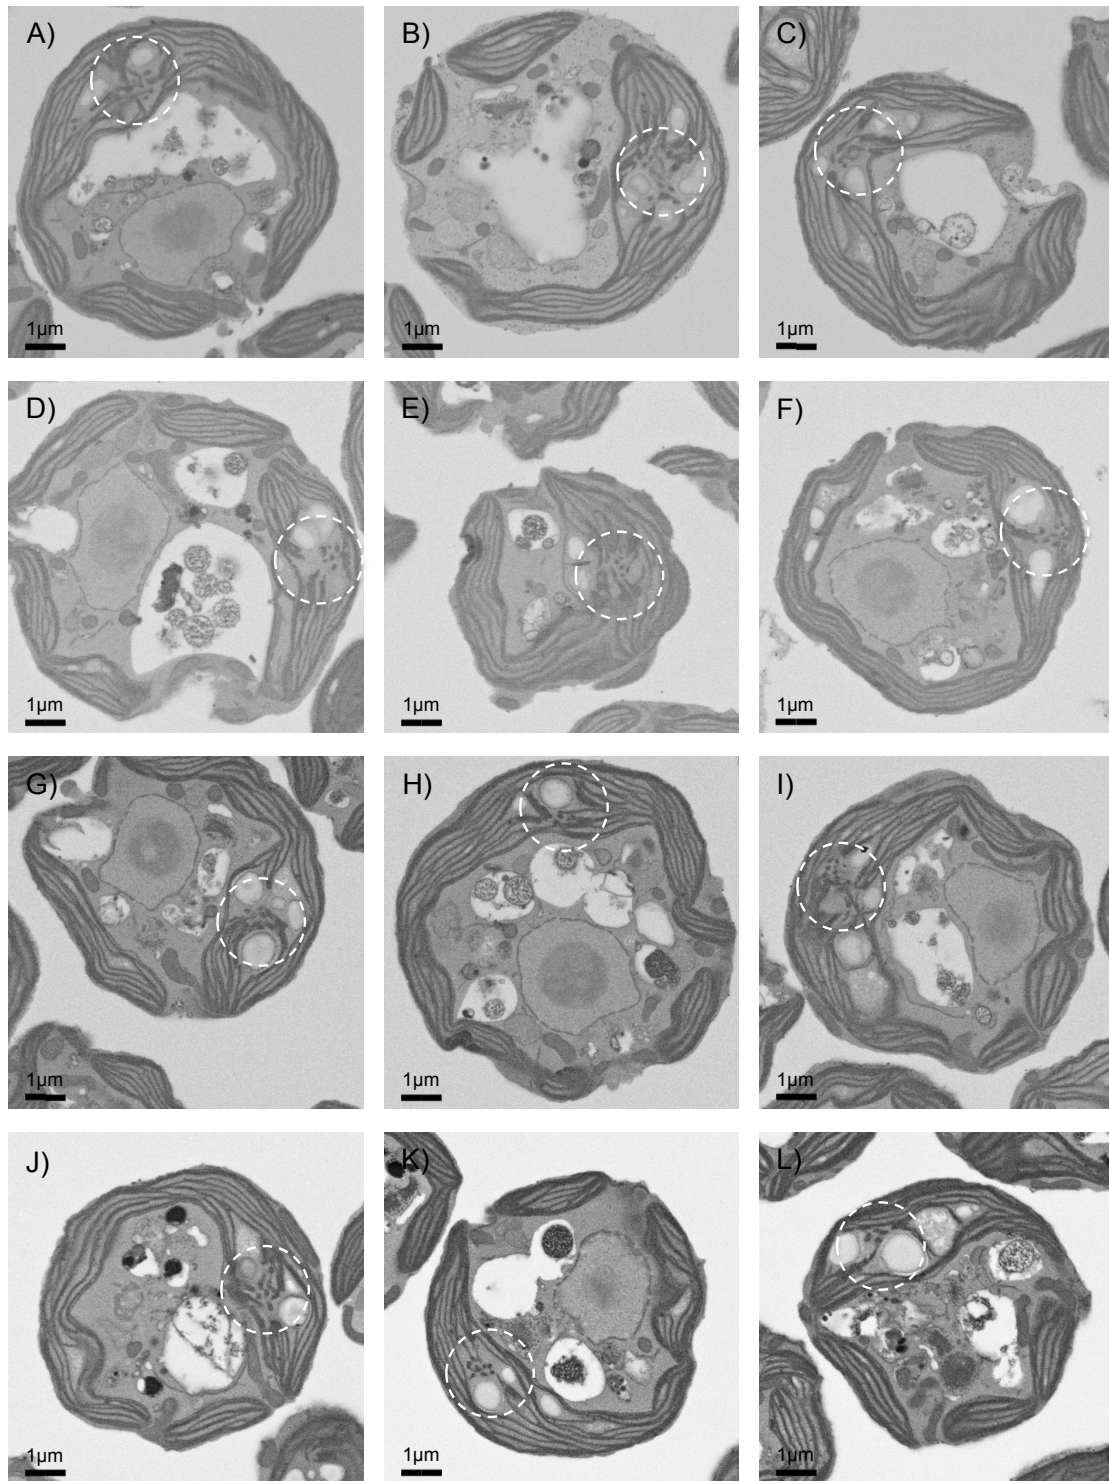

### S1: Knotted thylakoid tubules persist in the absence of a pyrenoid

Block face scanning electron microscopy images show *pyr-* cells (*Spinacia RBCS*) grown at air. A circle highlights the location where the pyrenoid would normally be expected in a WT cell. For comparison with the main text, (A) is the same as Fig. 1H.
